1  
2  
3  
4  
5  
6  
7  
8  
9  
10  
11  
12  
13  
14  
15  
16  
17  
18  
19  
20  
21  
22  
23  
24  
25  
26  
27  
28  
29  
30

# An Observational Study of Ballooning in Large Spiders: Nanoscale Multi-Fibers Enable Large Spiders' Soaring Flight

Moonsung Cho<sup>1,2\*</sup>, Peter Neubauer<sup>2</sup>, Christoph Fahrenson<sup>3</sup> and Ingo Rechenberg<sup>1</sup>

(1) Technische Universität Berlin, Institut für Bionik und Evolutionstechnik, Ackerstraße 76 / ACK 1, 13355 Berlin, Germany

(2) Technische Universität Berlin, Institut für Biotechnologie, Ackerstraße 76 / ACK 24, 13355 Berlin, Germany

(3) Technische Universität Berlin, Zentraleinrichtung Elektronenmikroskopie, Straße des 17. Juni 135, 10623 Berlin, Germany

\*Author for correspondence, Email: m.cho@campus.tu-berlin.de

**Abstract.** The physical mechanism of aerial dispersal of spiders, “ballooning behavior,” is still unclear because of the lack of serious scientific observations and experiments. Therefore, as a first step in clarifying the phenomenon, we studied the ballooning behavior of relatively large spiders (heavier than 5 mg) in nature. Additional wind tunnel tests to identify ballooning silks were implemented in the laboratory. From our observation, it seems obvious that spiders actively evaluate the condition of the wind with their front leg (leg I) and wait for the preferable wind condition for their ballooning takeoff. In the wind tunnel tests, as yet unknown physical properties of ballooning fibers (length, thickness and number of fibers) were identified. Large spiders, 16–20 mg *Xysticus* species, spun 50 to 60 nanoscale fibers, with a diameter of 121 to 323 nm. The length of these threads was  $3.22 \pm 1.31$  m ( $N = 22$ ). These physical properties of ballooning fibers can explain the ballooning of large spiders with relatively light updrafts,  $0.1\text{--}0.5$  m s<sup>-1</sup>, which exist in a light breeze of  $1.5\text{--}3.3$  m s<sup>-1</sup>. Additionally, in line with previous research on turbulence in atmospheric boundary layers and from our wind measurements, it is hypothesized that spiders use the ascending air current for their aerial dispersal, the “ejection” regime, which is induced by hairpin vortices in the atmospheric boundary layer turbulence. This regime is highly correlated with lower wind speeds. This coincides well with the fact that spiders usually balloon when the wind speed is lower than 3 m s<sup>-1</sup>.

Keywords: spider ballooning, nanoscale fiber, dispersal, turbulence, hairpin vortex, coherent structure

## 31 1. Introduction

32 Some spiders from different families, such as Linyphiidae (sheet-weaver spiders), Araneidae (orb-weaving  
33 spiders), Lycosidae (wolf spiders) and Thomisidae (crab spiders) can disperse aurally with the help of their silks,  
34 which is usually called ballooning behavior [1–6]. There are two representative takeoff methods in ballooning  
35 flight; “tiptoe” and “rafting” [7–10]. If spiders perceive appropriate weather conditions for ballooning, they climb  
36 up to the highest position of a blade of grass or a branch of a tree and raise their abdomen as if standing on their  
37 tiptoes, in order to position the abdomen at the highest level, before spinning the ballooning lines. They release a  
38 single or a number of silks in the wind current and wait until a sufficient updraft draws their body up in the air.  
39 This is known as a “tiptoe” takeoff [9,10] (see S1, S2). Another takeoff method is called “rafting,” where spiders  
40 release the ballooning lines from a hanging position relying on their drag line [7,8,10] (see S3). In this way, some  
41 spiders can travel passively hundreds of kilometers and can reach as high as 4.5 kilometers above sea level [11,12].  
42 For example, one of the first immigrant species on new-born volcanic islands are known to be spiders [13–15].  
43 Aerial dispersal of spiders is an influential factor on agricultural economy and ecology, because spiders are highly  
44 ranked predators in arthropods and impact on a prey’s population [16]. Due to the spider’s incredible aerial  
45 dispersal ability, the physical mechanism of a spider’s flight has been questioned for a long time, not only in public  
46 media but also in scientific research [16–23].

47 Ballooning dispersal is efficiently used by spiderlings (young spiders) just a few days after eclosion from their  
48 eggs) to avoid cannibalism at their birth sites, which are densely populated by hundreds of young spiders, and to  
49 reduce competition for resources [23,24]. Some adult female spiders balloon to find a place for a new colony  
50 [4,25,26] and others balloon to search for food and mates [4,27]. Most of the ballooning spiders were spiderlings  
51 and spiders under 3 mm in length and 0.2 to 2 mg in mass [1–5,28,29]. Nevertheless, there are only a few reports  
52 on the ballooning of large spiders (over 3 mm in length, over 5 mg in mass) [4,5,25,26].

53 Spiders balloon most frequently during late spring and autumn seasons [2,4,30]. The influences of microclimates  
54 on ballooning, such as temperature, humidity and wind conditions, have been extensively studied: (i) Many studies  
55 agree on a positive correlation of temperature [1,3,31] or a rapid increase in temperature [31–34]; (ii) low humidity  
56 is favorable for spiders to balloon [1,32,34]; (iii) for small spiders, 0.2–2 mm in length, the favorable mean wind  
57 speed is limited to 3 m s<sup>-1</sup> at a level of 2 m [30,31,35]. The local favorable wind speeds were 0.35–1.7 m s<sup>-1</sup> in  
58 experiments and 0.55–0.75 m s<sup>-1</sup> in nature [1,3]. These values, however, differ for spiders of different sizes  
59 (between 0.78–1.21 mm) [1,36]. Recently, Lee et al. showed that not only the mean wind speed at a level of 2 m  
60 but also the local wind speed can be limited by a wind speed of 3 m s<sup>-1</sup> for spiderlings [37]. Instability of  
61 atmosphere was pointed out as an influential factor [30,31,35]. Suter and Reynolds suggested a possible relation

62 of spiders' ballooning behavior with atmospheric turbulent flow [16,20].

63 There have been a number of models that have tried to explain spiders' high buoyant capability (aerial dispersal  
64 capability): a fluid-dynamic lollipop model [17], a flexible filament model in turbulence [16] and an electrostatic  
65 flight model [22]. Recently, Zhao et al. implemented the two-dimensional numerical simulation using an immersed  
66 boundary method, which can simulate the ballooning dynamics in more detail [38]. The result shows that the  
67 atmospheric instability enables longer suspension of a balloon in the air, which agrees with the result of  
68 Reynolds's simulation and suggests that a spider may sense the vibration of vortex shedding on the spider silk  
69 through their silk [16,38], which is an interesting hypothesis.

70 In spite of the abovementioned models and studies, dynamics in spiders ballooning are still not well understood,  
71 because of a lack of serious scientific observation studies and specific experiments. Many of the ballooning spiders  
72 are very small with weights of 0.2–2 mg, which are difficult to study [1,3,36,37]. Many described experiments  
73 were not focusing on the spider's ballooning behavior itself, but assumed that spiders use a certain length of the  
74 drag line [18,19,21]. The ballooning of large spiders is also a struggle because of (i) the observed physical  
75 properties of ballooning silks and spider size (60–80 cm long and 3–4 silk threads, 85 to 150 mg body weight) of  
76 an adult of *Stegodyphus mimosarum* seemed to be unrealistic for ballooning [25], because the required vertical  
77 speed of wind was 9.2 to 21.6 m s<sup>-1</sup> according to Henschel's calculation [18,39]; (ii) Humphrey's model cannot  
78 explain the ballooning flight of spiders with a weight of over 9 mg, because of the mechanical properties of a  
79 spider silk [17]. The following questions are still to be answered: (i) How many and how long are the silk fibers  
80 needed for ballooning, especially in the case of large spiders with weights over 5 mg? (ii) Which silk fibers and  
81 glands are used for ballooning? (iii) How do ballooning silks shape during the flight? (iv) Do spiders control the  
82 buoyant capability by changing the length of silks or their pose during the flight? (v) Why do spiders usually  
83 balloon at a low wind speed (below 3 m s<sup>-1</sup>)?

84 The aim of this paper is to offer behavioral clues and quantitative data in ballooning flight that may answer these  
85 questions. Therefore, we investigated the ballooning behavior of adult and subadult crab spiders (*Xysticus* species,  
86 Thomisidae), that had a size of 3–6 mm and a weight of 6–25 mg. This observation of large spiders could provide  
87 a good basis for the physical characterization of ballooning. Additional experiments were performed in a wind  
88 tunnel, for a precise documentation of ballooning silks and to analyze the details of ballooning behavior. Also, the  
89 aerodynamic environment on a flat grass field was measured to investigate the usable updraft for a ballooning  
90 flight.

91

92

## 93 2. Materials and methods

### 94 2.1 Field observations

95 Crab spiders (*Xysticus cristatus*, *Xysticus audax*, etc.) were collected at Lilienthal Park and along the Teltow canal  
96 in the Berlin area, Germany, and observed each autumn, especially during October, from 2014 to 2016. Lilienthal  
97 Park was selected for the observation of pre-ballooning behavior, because the ballooning phenomenon of adult and  
98 subadult crab spiders is frequently observed in this region.

#### 99 2.1.1 Takeoff

100 On sunny and partly cloudy days in autumn, 14 crab spiders (8 females, 2 males and 4 not identified; adult or  
101 subadults) were collected at Lilienthal Park. These spiders were released in the same place on a self-built artificial  
102 mushroom-like platform (a 5.5 cm diameter half sphere, 1.2 m above a ground surface, gypsum material). This  
103 platform was intended to stimulate tiptoe pre-ballooning behavior. Because of its convex surface (half sphere),  
104 spiders can easily recognize that the top of the convex surface is the highest position that may promote tiptoe  
105 behavior. The white color of this platform allowed the visual clarity of the spider's behavior. During the  
106 observation, the ballooning behaviors were recorded by digital camera. Additionally, titanium tetrachloride was  
107 used for the flow visualization of the wind. The local wind speed and temperature were not measured directly, but  
108 the values from the Dahlem weather station (4.5 km distance from the observation site, the anemometer is installed  
109 36 m above the ground in the 20 m-high forest canopy) may provide approximate conditions.

#### 110 2.1.2 Statistical analysis of pre-ballooning behaviors

111 The 14 crab spiders were set a total of 25 times onto the mushroom shaped platform in natural weather. The detailed  
112 pre-ballooning behaviors in "takeoff" observation were analyzed statistically: (i) active sensing motion, (ii) tiptoe  
113 motion, (iii) tiptoe takeoff, (iv) drop down, (v) rafting takeoff (see "takeoff" in the results section). If they did not  
114 tend to balloon or hid for about 5 min, they were recollected. Once a spider raised one or both front legs (leg I)  
115 and then put them back again on the platform, this was considered to be an active sensing motion and was counted  
116 as one behavior. Tiptoe motion, raising the abdomen and putting it down again was also counted as one motion.  
117 The transitions between behaviors were counted. These numbers were first expressed as percentage frequency by  
118 normalizing with the total number of transitions (see equation (1),  $f_{i,j}$  is a normalized frequency of the transition  
119 from i-th to j-th behavior.  $n_{i,j}$  is the number of the transition from i-th to j-th.  $m$  is the number of categorized  
120 behaviors). The probability from one behavior to next behavior is expressed by normalizing with the total number  
121 of previous behaviors (see equation (2),  $p_{i,j}$  is the probability of the transition from i-th to j-th behavior.).

$$f_{i,j} = \frac{n_{i,j}}{\sum_{i=1}^m \sum_{j=1}^m n_{i,j}}, \quad \sum_{i=1}^m \sum_{j=1}^m f_{i,j} = 1 \quad (1)$$

$$p_{i,j} = \frac{n_{i,j}}{\sum_{j=1}^m n_{i,j}}, \quad \sum_{j=1}^m p_{i,j} = 1 \quad (2)$$

122

### 123 2.1.3 Gliding

124 Gliding of crab spiders was observed in the autumn along the Teltow canal, due to the ecological and topographical  
125 benefits for the observation of ballooners: (i) crab spiders frequently glide along the canal during the autumn; (ii)  
126 the angle of the sun's rays in the morning was appropriate for the detection of the ballooning silks during their  
127 flight; (iii) the dense trees on the opposite side of the canal provide a dark background, which facilitates the  
128 observation of floating silks. The shape of the threads during flight could not be photographed nor recorded as a  
129 video, because only limited parts of the ballooning threads were reflected by the sun's rays. However, the  
130 movement and shape of the threads could be recognized with the naked eye and these shapes were quickly sketched  
131 by hand.

132

## 133 2.2 Identification of ballooning lines

### 134 2.2.1 Sampling of ballooning lines

135 Twelve crab spiders (9 females and 3 males, adult or subadult) were used for the wind tunnel experiment. Pre-  
136 ballooning behavior of these spiders was induced in front of an open jet wind tunnel in which the diameter of the  
137 nozzle exit is 0.6 m (see Fig. 1A). The spinning behaviors that led to the ballooning silks was observed precisely.  
138 There were no obstacles next to the wind tunnel, leaving about 9 m of free space from the nozzle, to allow  
139 ballooning fibers to float horizontally without any adhesion to other objects. The wind speed and temperature were  
140 measured with a PL-135 HAN hot-wire anemometer. To enable sampling of the ballooning fibers, the wind speed  
141 was adjusted at  $0.9 \text{ m s}^{-1}$ , because spiders drifted downstream if the wind speed was above  $1 \text{ m s}^{-1}$ . The room  
142 temperature was  $22^{\circ}\text{--}25^{\circ}\text{C}$ . The ballooning behavior was stimulated with a 1000 watts hair dryer (low wind speed  
143 mode) that produces warm air ( $28^{\circ}\text{--}33^{\circ}\text{C}$ ) and the fluctuation of wind. The hair dryer was positioned beneath the  
144 nozzle of the wind tunnel upward to avoid direct exposure to hot wind from the hair dryer (see S4). As soon as  
145 spiders showed tiptoe behavior, the hair dryer was turned off. The turbulent intensity of the wind tunnel was 1.1%  
146 (without the hair dryer) and 11.3% (when the hair dryer turned on). There was difference in temperature between  
147 the laboratory and the field. The difference can be explained as follows: First, the ballooning behavior is coupled  
148 not only with weather condition but also with biological condition, e.g. seasonal dispersal, mating and insufficient

149 resources, etc [2,4,26,30]. If the biological pressure, for spiders to disperse, is high, spiders may try to disperse  
150 even though it is low temperature. Second, the sudden increase of temperature acts on ballooning behavior as an  
151 influential factor [31–35]. If there is the sudden increase of temperature, e.g. because of sunshine in the morning,  
152 the ballooning behavior can be triggered even in low temperature condition. There are some reports that spiders  
153 ballooned also at relatively low temperature, 10°–20°C [33,34; the author’s field observation (13°–19°C)].  
154 Ballooning fibers were collected on a microscope slide, on which two narrow strips of a double-sided bonding  
155 tape were attached. The ballooning fibers were sampled near the spinnerets (see Fig. 1B). A total of 11 samples  
156 were prepared from 28 spinning events of ballooning silks. (In the experiment, a total of four spiders responded to  
157 show ballooning behavior. Two of them were very active.). Two samples were selected, because the other 9 samples  
158 failed to capture all the ballooning fibers on a single microscope slide or the fibers on the slide were deranged  
159 during the capturing process. Simultaneously, silk fibers were captured on a square wire frame and carefully wound  
160 around it in order to measure the length of ballooning threads (see Fig. 1C). The length of the silks was calculated  
161 by multiplying the total number of half revolutions by the width of the square wire frame (200 mm). The successfully  
162 sampled ballooning fibers were later studied with a field emission scanning electron microscope.

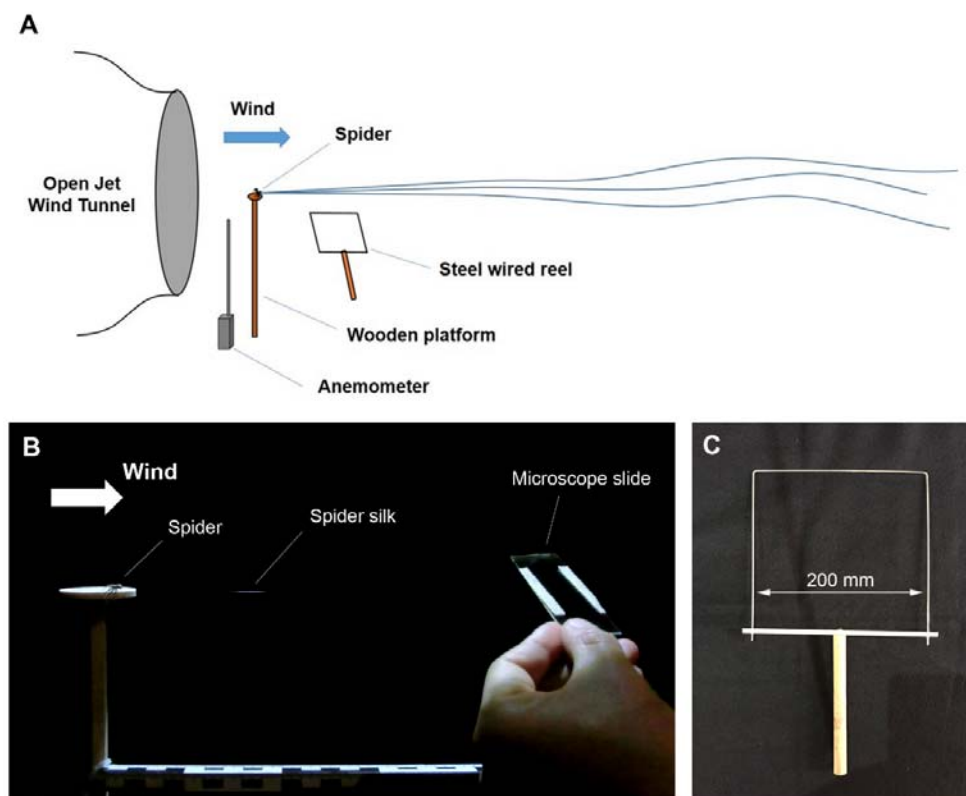

163 **Fig. 1. (A) A schematic view of wind tunnel tests. (B) Sampling of ballooning fibers in front of an open jet wind tunnel. (C) Reel with a steel wire to measure the length of ballooning silks.**

### 164 2.2.2 Field emission scanning electron microscopy (FESEM)

165 The sampled ballooning fibers were coated with gold using a sputter coater (SCD 030, Balzers Union) and

166 observed with a field emission scanning electron microscope (DSM 982 Gemini, ZEISS, with 5–10 kV  
167 accelerating voltage). The number of ballooning fibers was carefully counted and the thickness of fibers was  
168 measured. The spinnerets of a female *Xysticus cristatus*, were also observed with the FESEM. For sample  
169 preparation, the female spider was fixed in 2.5% glutaraldehyde and dehydrated in ascending concentrations of  
170 ethyl alcohol from 30% to 100% (10 min at each concentration). After dehydration, the sample was dried with a  
171 critical point dryer (CPD 030, BAL-TEC). The prepared sample was coated with gold using a sputter coater (SCD  
172 030, Balzers Union) and observed with the FESEM (SU8030, Hitachi, with 20 kV accelerating voltage).

### 173 2.3 Investigation of the aerodynamic environment

174 For the investigation of the turbulent atmospheric boundary layer, ultrasonic three-dimensional wind speed  
175 measurement took place on a grass field (53° 11' 42" N, 12° 09' 40" E, see Fig. 2A, B). This place is also a habitat  
176 of the *Erigone* and *Xysticus* genus which do also ballooning behavior. To avoid mechanically induced updrafts by  
177 hills, trees and rocks, a flat grass field was selected. The three-dimensional wind speed data at different two mean  
178 wind speeds (1.99 m s<sup>-1</sup> and 3.07 m s<sup>-1</sup>) were measured on a sunny day in the autumn for 5 min with the sampling  
179 frequency of 20 Hz. In order to eliminate small-scale fluctuation in the turbulent boundary layer, a quadrant  
180 analysis was introduced [40–44] (see equation (3),  $u$  and  $w$  are, respectively, horizontal and vertical wind speeds.  
181  $u'$  and  $w'$  mean, respectively, streamwise fluctuating velocity and vertical fluctuating velocity. Those are equal to  
182 the subtracted values of the actual values of velocity minus the mean values of wind speed.  $H$  is the threshold  
183 parameter, which means the size of a hole.  $u'_{rms}$  and  $w'_{rms}$  indicate root mean squared fluctuation velocities.).

$$u'w' \geq H(u'_{rms}w'_{rms}) \quad (3)$$

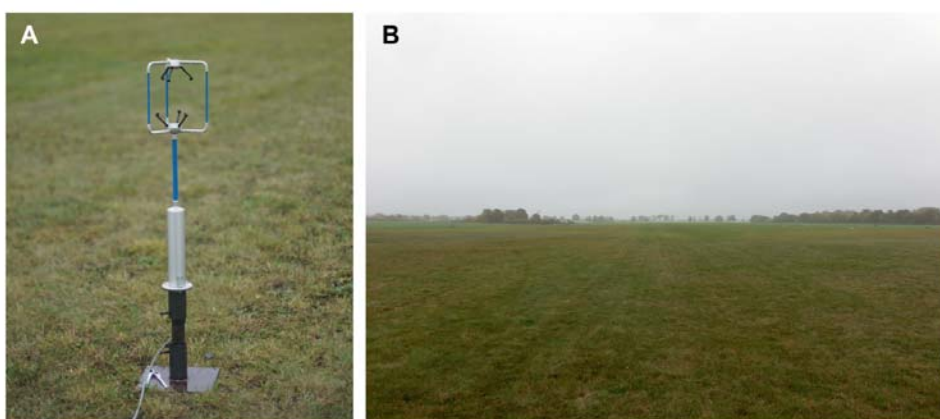

184 **Fig. 2. (A) A three-dimensional ultrasonic anemometer (Windmaster 1590-PK-020, Gill Instruments) is installed 0.95 m above the ground. (B) The simplest conditions (i.e. a flat surface) were selected. The flat place is covered with the 6 cm-short cut grass. Within a radius of 300 m, there is no obstacle object.**

### 185 2.4 Animal care

186 Each adult and subadult crab spider (*Xysticus* genus) was raised separately in a plastic box (length × width × height:  
187 13 × 13 × 7 cm), which has ventilation holes. Once a week, the spiders were fed a mealworm, *Tenebrio molitor*,



188 and moisture was provided with a water spray.

## 189 2.5 Ethics

190 The species used in the experiments (*Xysticus* genus) are not endangered or protected species. No specific  
191 permissions were required. All applicable international, national and institutional guidelines for the care and use  
192 of animals were followed.

193

## 194 3. Results

### 195 3.1 Field observations

#### 196 3.1.1 Takeoff

197 In the *Thomisidae* family, not only female but also male adult spiders showed ballooning behaviors (see S1).  
198 During the observation days, the temperature was 16°–19°C and the mean wind speed was 6–7 m s<sup>-1</sup> (gust 14–17  
199 m s<sup>-1</sup>) as reported by the nearest weather station in Dahlem. The sensor was installed on 36 m position above the  
200 ground. Therefore, the local wind speed at 1.2 m above the ground must be much lower than these values. Later,  
201 we checked the wind speed on a similar day, on which the mean wind speed from the weather station showed 6–7  
202 m s<sup>-1</sup>. The mean wind speed for 10 min showed 2.11 m s<sup>-1</sup>.

203 On the experiment day, the spiders mostly showed tiptoe behavior. At the first stage of tiptoe behavior, the crab  
204 spider evaluated the wind condition, not just passively through the sensory hairs on its legs, but rather actively, by  
205 raising one of its front legs (leg I) or sometimes both, and waited in this position for 5–8 sec (see Fig. 3A, B, C).  
206 This sensing behavior was often repeated a few times before the tiptoe pose. After each sensing step, the crab  
207 spider rotated its body in the direction of the wind (see Fig. 3C, D).

208 If the spider decided that the wind was adequate to balloon, it raised its abdomen (already known as a tiptoe  
209 behavior, see Fig. 3D) and spun its ballooning silks without any help from its legs. Before spinning ballooning  
210 silks, there was a motion of a rear leg (leg IV) (see S5), with which the spider holds its safety line that connected  
211 its spinnerets to the substrate, and then put it on the substrate (see S2A, B).



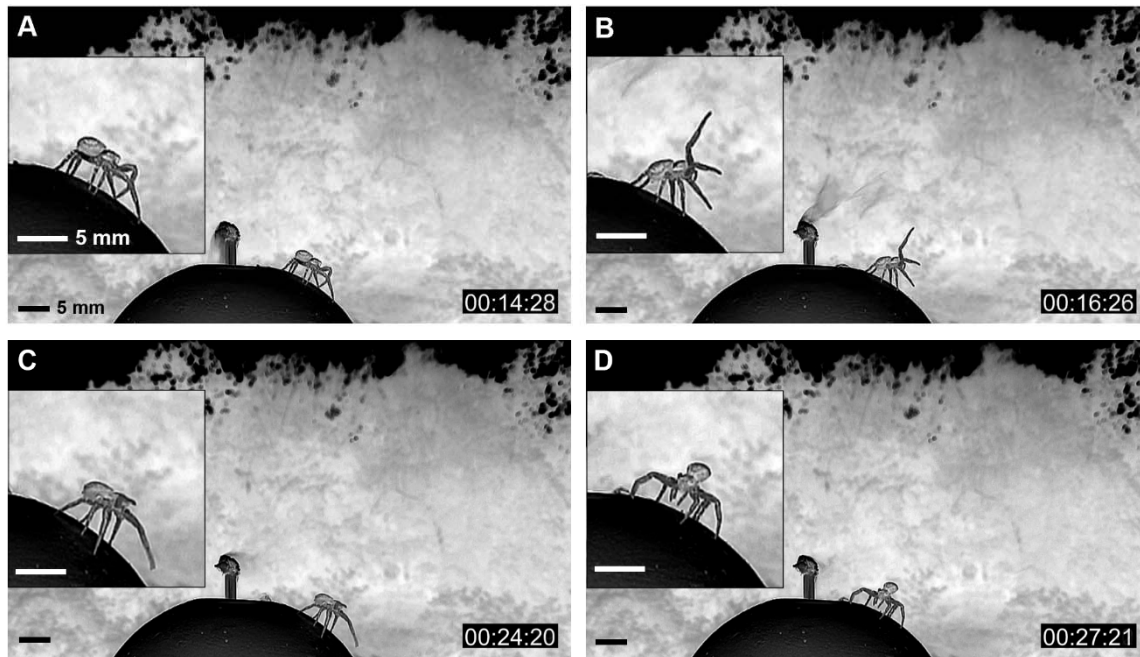

**Fig. 3. Sequence of active sensing motion with front leg (leg I) (negative images). (A) The spider first senses the condition of the wind current only through sensory hairs on its legs. (B) Then, if the condition seemed appropriate, the spider sensed more actively by raising its leg I and keeping this pose for 8 sec. (C) If the spider decided to balloon, it altered its posture. (D) The spider rotated its body in the direction of the wind and assumed tiptoe posture.**

212

213 The crab spider first spun a single or a few number of fibers, and then many fibers (see Fig. 4A–G). The spun  
214 ballooning fibers were approximately 2–4 m long and formed a triangular sheet, which fluttered among the  
215 turbulent flows of wind. The vertex angle of this triangular sheet was about 5–35 degrees (see Fig. 4C–G). If the  
216 wind condition was not appropriate, the spider cut the silk fibers and spun them again. If the ballooning silks  
217 generated enough drag, the spider released the substrate and became airborne (see Fig. 4H). From careful video  
218 investigation, it was observed that spiders stretched their all legs outwards, as soon as the spiders achieved takeoff.  
219 Many ballooned crab spiders soared diagonally upwards along the wind flows. This paths had 5–20 degrees  
220 inclination above the horizon. Some spiders traveled quasi-horizontally. Some spiders soared along a steep path  
221 (about 45 degrees). During this steep takeoff, the spiders took off with relatively slow speed. The anchored drag  
222 line (safety line) between the platform and the spider’s spinneret could be seen. This anchored line endured without  
223 breaking, until it became 3–5 meters long. After a while, it was broken mechanically. From the wind tunnel  
224 experiment, it was found that the anchored line consists of two fibers.

225 Three new facts about ballooning were uncovered. First, the crab spider does not evaluate the wind condition  
226 passively, but actively, by raising one of its front legs (leg I). Second, this adult balloonner anchors its drag lines on  
227 the platform not only during its rafting takeoff, but also during tiptoe takeoff. Third, the crab spider postures all its  
228 legs outwards and stretched, when airborne, not only at the takeoff moment, but also during the gliding phase (see  
229 S6A–D).

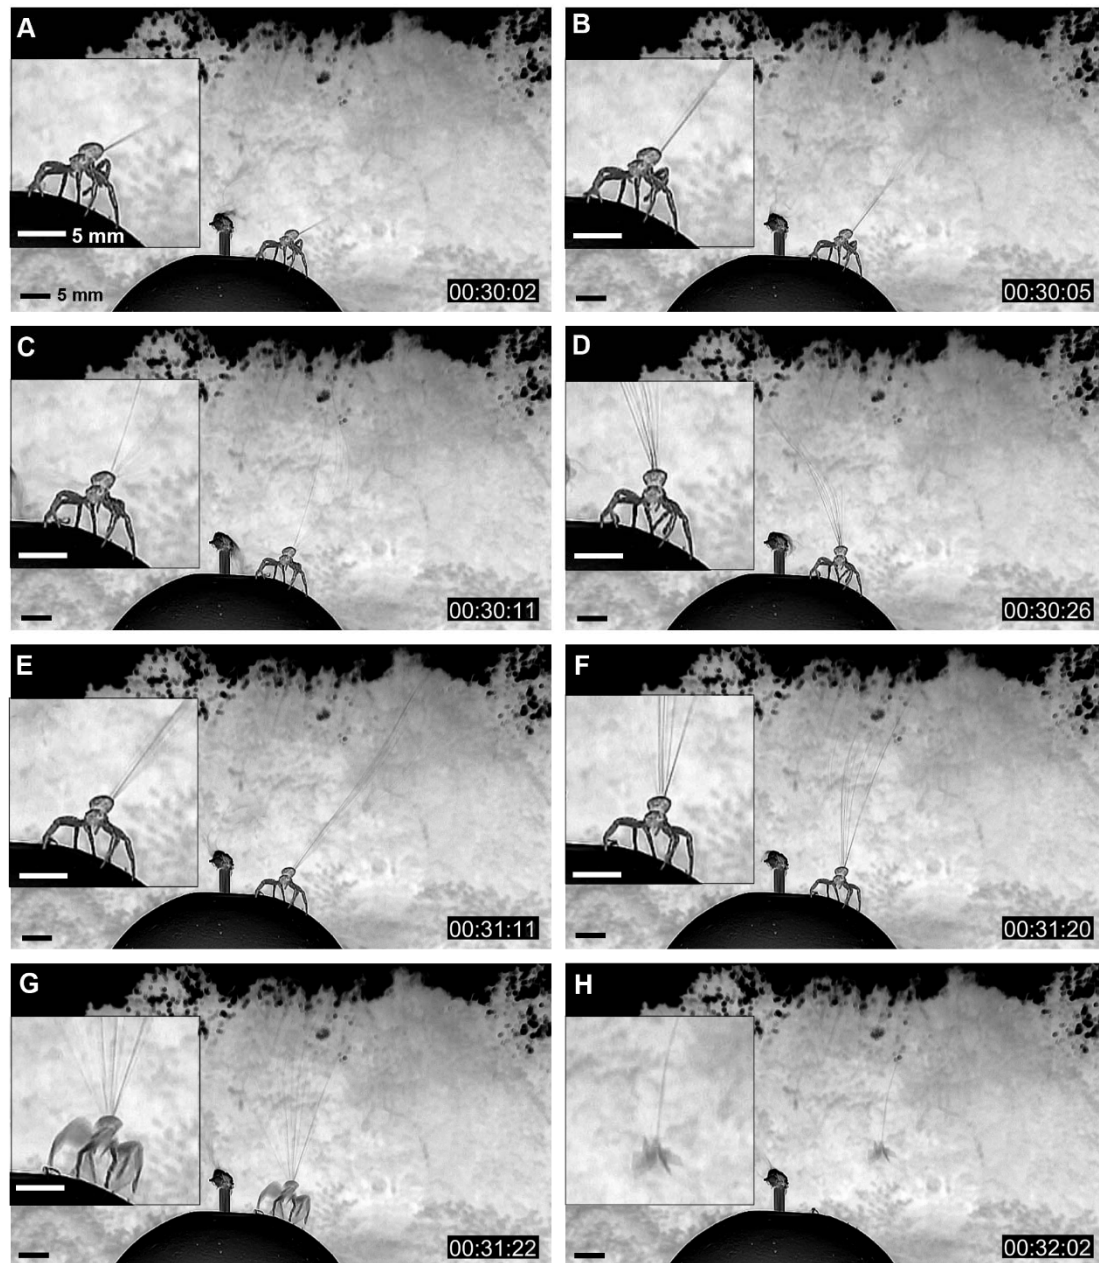

**Fig. 4. A crab spider's ballooning process (images were converted to negative images to visualize ballooning lines). (A, B) Initial phase of spinning ballooning lines; (C, D, E, F) Fluttering of a bundle of ballooning lines. Because of turbulent flows in wind, the ballooning threads fluttered unsteadily; (G) Takeoff moment; (H) Airborne state of a ballooning spider. (Original video: see the movie S10 in supporting information.)**

230

231 Rafting pre-ballooning behavior was also observed. The local weather condition was a little bit colder and windier  
232 than that of the previous observation day of tiptoe takeoff. Crab spiders were not active on that day. As soon as  
233 they were set on the platform, they showed one of two behaviors. Either they hid on the opposite side of the  
234 platform to avoid the wind, or they quickly retreated downwards about 0.4 to 1.1 m relying on their drag lines (see  
235 S3A, B), and spun their ballooning fibers downstream of the wind. At this time, spiders spun a single or a few  
236 number of fibers first, and then many fibers, as they showed during the tiptoe takeoff (see S3C, D). During this  
237 process, the spiders also postured all their front legs and second legs outwards and backwards, so that they hung

238 and directed their bellies in an upwards direction of the wind. The backward (downstream) spun threads slowly  
 239 curved upwards and the spiders' bodies also slowly moved upwards (see S3D). At some point, when the threads  
 240 had generated enough drag and lift, the drag lines near the spinnerets were cut and the spider finally ballooned (see  
 241 S3E, F).

242

### 243 3.1.2 Statistical analysis of pre-ballooning behaviors

244 The spiders showed 67 active sensing motions with their leg I. Forty-four tiptoe pre-ballooning motions could be  
 245 observed. Six spiders had ballooned successfully after their tiptoe pose (see S7). They also dropped down 8 times  
 246 relying on their drag line. Three of them showed a rafting takeoff (see S7).

247 The initial behaviors were mostly started with sensing motion. The frequent transitions between different behaviors  
 248 were occurred between sensing motion and tiptoe motion (see Fig. 5A). Spiders flew from only either the tiptoe  
 249 pose or the dropping and hanging pose (see Fig. 5B). The probability of the ballooning takeoff from tiptoe behavior  
 250 was 9.5%. The probability of the ballooning takeoff from the rafting pose was 37.5%.

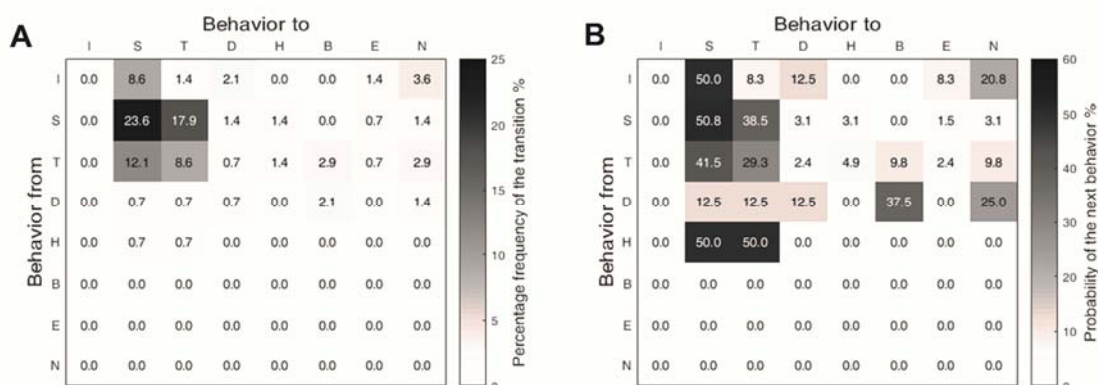

251 **Fig. 5. (A) The percentage frequency of the behavior transition (the total number of transitions:  $N = 144$ ; I: initial state, S: Sensing motion, T: Tiptoe behavior, D: Dropping and hanging behavior, H: Hiding motion, B: Takeoff, E: Escape, N: Not flown). (B) The transition matrix between behaviors (the total numbers of categorized behaviors:  $N_I = 25$ ,  $N_S = 67$ ,  $N_T = 42$ ,  $N_D = 8$ ,  $N_H = 2$ ).**

252 The duration of each tiptoe behavior was measured and their frequencies were analyzed. Short period tiptoe poses,  
 253 which lasted for less than 5 sec, were the most frequent. The longest tiptoe event lasted 65 sec. Successful  
 254 ballooning takeoffs were not biased in relation to tiptoe duration (see Fig. 6).

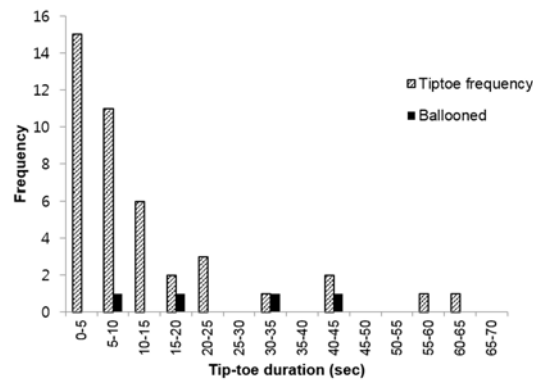

**Fig. 6. Frequency diagram of tiptoe behaviors according to tiptoe duration (N = 42). Black columns are the tiptoe behaviors that were connected to the successful ballooning takeoffs (N = 4).**

255

### 3.1.3 Gliding

256

257 A total of 32 floating threads were observed at the Teltow canal. Most of them were horizontally transported along  
258 the channel at about 1–8 m above the water surface. They drifted passively due to light wind, but rarely fell down.  
259 Some of their silks were inclined downstream. The others were inclined upstream. Two of 32 floating threads were  
260 just threads alone without a spider. The number of observed threads was one to five. However, as not all threads  
261 were visible with the naked eye, some may have been the multiple threads, which stuck together, although they  
262 seemed to be a single thread. Some of them may not have been seen, because of their inappropriate angles and  
263 positions in relation to the sun. Most of the spiders were positioned at the lower end of their threads. Although the  
264 threads showed different numbers and shapes, they were usually laid diagonally (see Fig. 7).

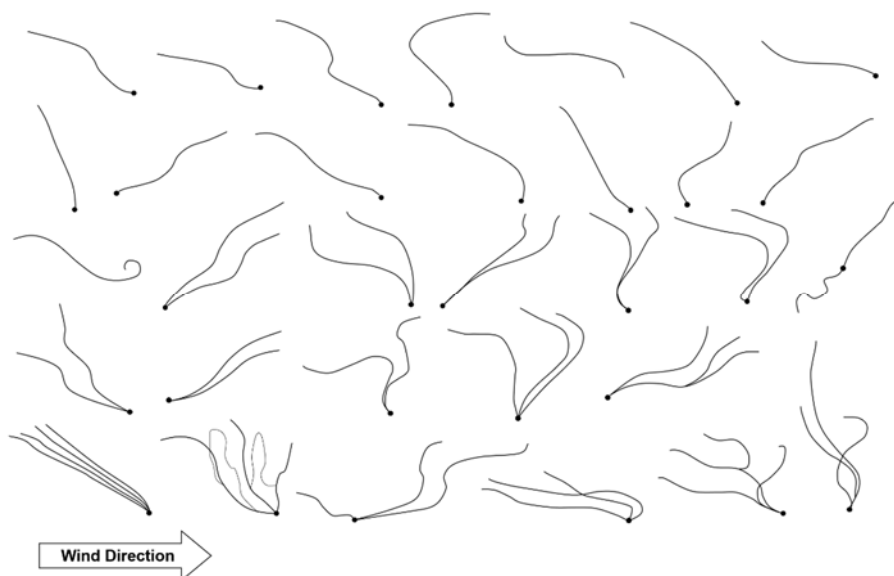

**Fig. 7. Sketches of ballooning structures (body + ballooning threads). These structures were observed above the water surface, at heights of 1–8 m. Wind was blowing from left to right. Therefore, these structures were transported in the same direction as the wind. Black and thick points represent spider's body. Black lines represent ballooning threads.**

265

### 3.2 Identification of ballooning fibers

266

267 The separation of glands for a drag line and ballooning lines was observed in ballooning behaviors in the laboratory.



268 The anchored drag line was connected to the anterior spinnerets and ballooning fibers were spun from either one  
 269 or both posterior or/and median spinnerets (see S5). The lengths of the ballooning fibers were measured,  $3.22 \pm$   
 270  $1.31$  m (N = 22), from 22 spinning events of two crab spiders (16.4 and 18 mg) (see Fig. 8). The maximum length  
 271 of the spun ballooning lines was 6.2 m.  
 272

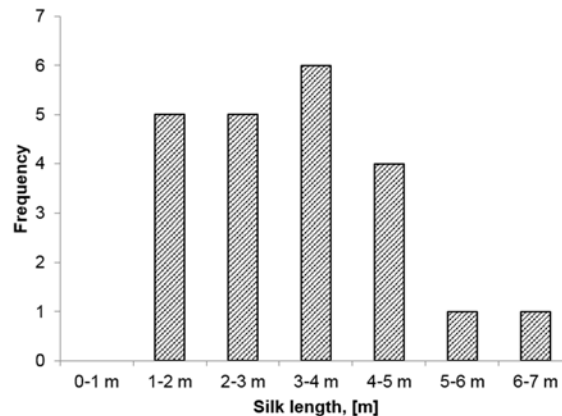

Fig. 8. Distribution of the length of ballooning lines (N = 22).

273  
 274 The successfully collected ballooning fibers of both *Xysticus cristatus* and *Xysticus* species were observed with  
 275 the FESEM. Ballooning fibers consisted of two thick nanoscale fibers that were attached together (see Fig. 9B, C)  
 276 and many thin nanoscale fibers (see Fig. 9A–D). The two adult spiders, *Xysticus* species, spun, 48 to 58 thin nano-  
 277 fibers and 2 thick nano-fibers (see Table 1). The thickness of the thin nano-fibers ranged from 121 to 323 nm with  
 278 an average of  $211.7 \pm 45.2$  nm (N = 40). The thickness of the thick nano-fibers was 698 to 768 nm with an average  
 279 of  $722.2 \pm 32.5$  nm (N = 4) (see Fig. 9B–D). The spun fibers were split independently (see Fig. 9A–D).  
 280 On the other hand, drag lines consist of one pair of fibers (see Fig. 9E) (sometimes two pairs, from left and right,  
 281 see Fig. 9F) which were spun from the major ampullate glands on the anterior spinnerets. The thickness of these  
 282 major ampullate silks was about 790 nm for *Xysticus cristatus* and 493 nm for *Xysticus audax*, respectively (see  
 283 Fig. 9E, F).

Table 1. Identification of the number and thickness of ballooning fibers through FESEM

| Species                                 | Weight  | Thin nanoscale fibers |                              | Thick nanoscale fibers |                             |
|-----------------------------------------|---------|-----------------------|------------------------------|------------------------|-----------------------------|
|                                         |         | Number of fibers      | Thickness of fibers          | Number of fibers       | Thickness of fibers         |
| Spider 1 <i>Xysticus spec. (f.)</i>     | 20.8 mg | 58                    | $192.3 \pm 36.3$ nm (N = 20) | 2                      | $734.0 \pm 48.1$ nm (N = 2) |
| Spider 2 <i>Xysticus cristatus (f.)</i> | 18 mg   | 48                    | $231.1 \pm 45.6$ nm (N = 20) | 2                      | $710.5 \pm 17.7$ nm (N = 2) |
| Average                                 | -       | $53 \pm 7.1$ (N = 2)  | $211.7 \pm 45.2$ nm (N = 40) | 2 (N = 2)              | $722.2 \pm 32.5$ nm (N = 4) |

284

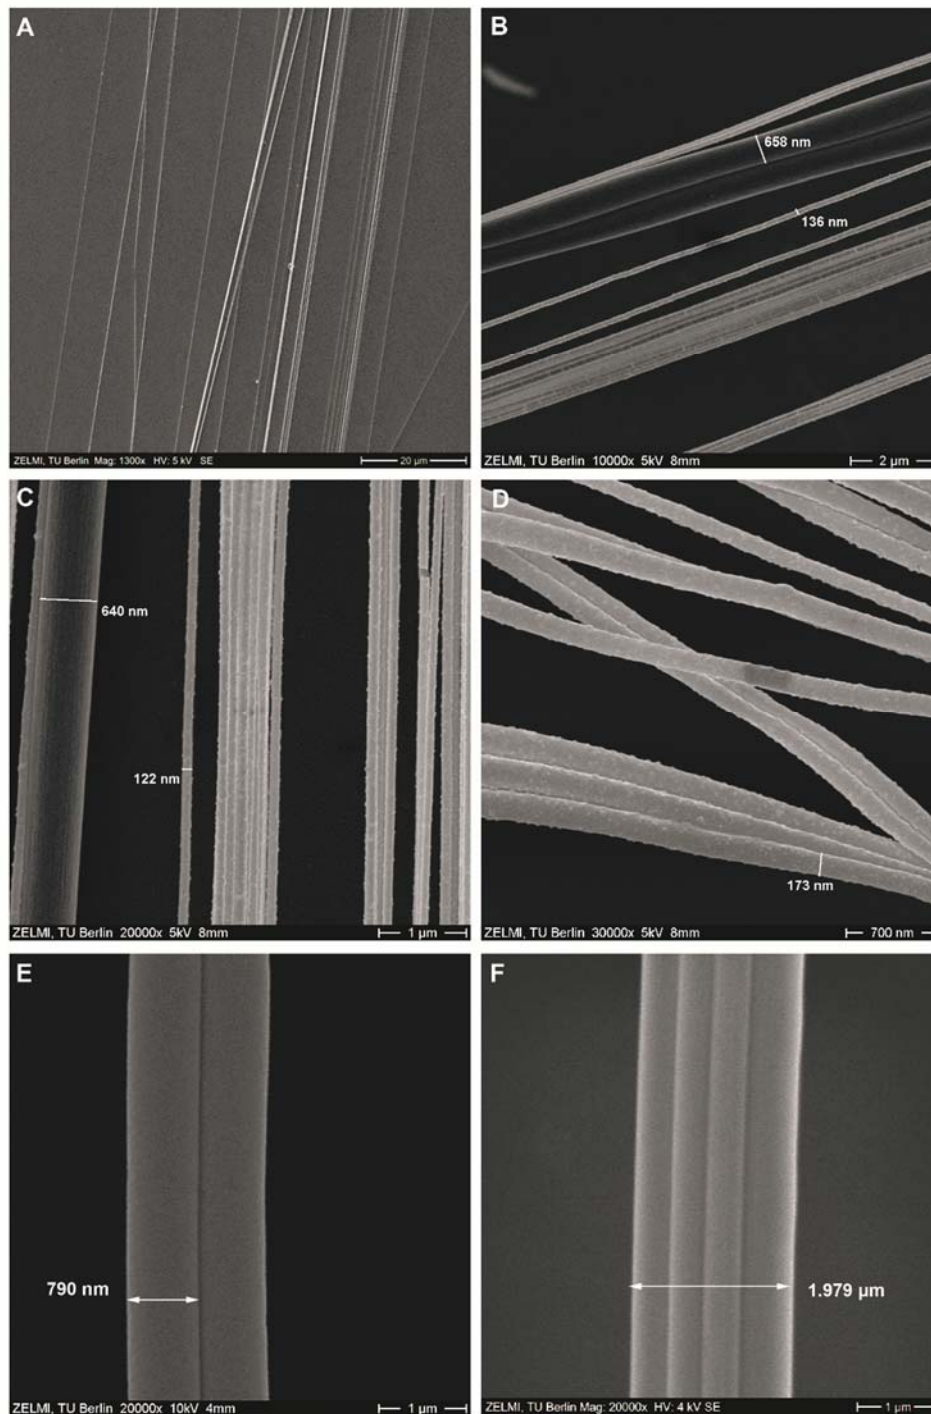

**Fig. 9.** (A) Ballooning fibers of *Xysticus cristatus*. (1300×). (B) Ballooning fibers of *Xysticus audax* (10000×). (C) Middle part of ballooning fibers of *Xysticus audax* (20000×). (D) A bundle of ballooning fibers of *Xysticus audax* at the end of threads (20000×). (E) One pair of drag fibers of *Xysticus cristatus* (a weight of 18 mg) (20000×). (F) Two pairs of drag fibers of *Xysticus* species (a weight of 15.6 mg), which attached together (20000×).

285

286

### 3.2 Aerodynamic environment on the short grass field

287

Two data sets at the different mean wind speeds ( $1.99 \text{ m s}^{-1}$  and  $3.07 \text{ m s}^{-1}$ ) for 5 min were collected. Usable

288

updrafts were investigated in the turbulent atmospheric boundary layer. Each of the cases showed the vertical

289

deviation of  $\pm 0.225 \text{ m s}^{-1}$  and  $\pm 0.267 \text{ m s}^{-1}$ , respectively, which ranged from  $-0.5$  to  $0.5 \text{ m s}^{-1}$  and from  $-0.6$  to  $0.7$

290

$\text{m s}^{-1}$  (see Fig. 10A, B). The turbulent intensities were 21 % and 23.7 % in the mean wind speeds of  $1.99 \text{ m s}^{-1}$  and

291  $3.07 \text{ m s}^{-1}$ , respectively. The vertical wind speed of both cases is negatively correlated to the horizontal wind speed.  
292 The slope of regression fits are  $-0.235$  ( $r = -0.575$ ) and  $-0.077$  ( $r = -0.259$ ), respectively. The horizontal wind  
293 speeds of both Q2s are positioned below the wind speed of  $3 \text{ m s}^{-1}$ .

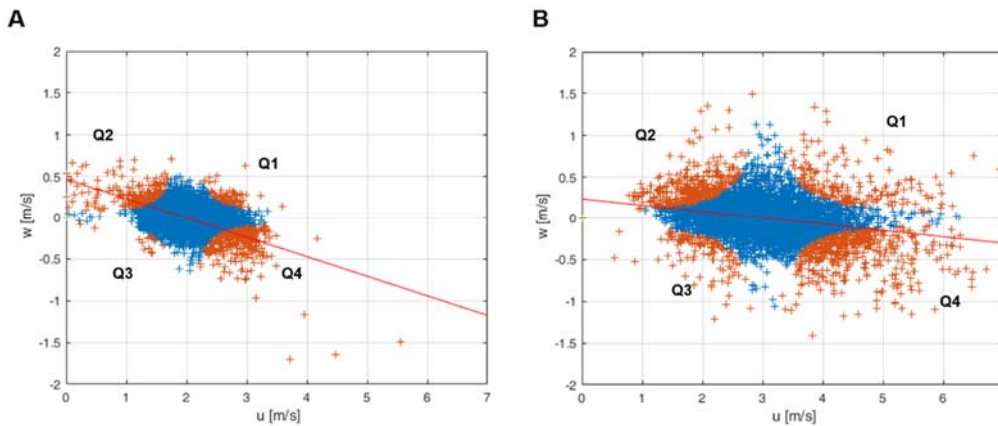

**Fig. 10. Horizontal and vertical components of the wind speeds for 5 min on  $u - w$  domain. (20 Hz sensing rate). Orange cross points: The quadrant data (Q1–Q4) of the measured wind speeds according to  $u'$  and  $w'$ . Blue cross points: The ignored data regarding as a small-scale fluctuation ( $H < 1$ ). Red lines are linear regression fit lines. (A) The case of  $1.99 \text{ m s}^{-1}$  mean wind speed. (30th October 2016 12:39 – 12:45 LT) (B) The case of  $3.07 \text{ m s}^{-1}$  mean wind speed. (29th October 2016 10:54 – 11:00 LT)**

294

295

#### 296 4. Discussion

297 From our observation, the physical properties of ballooning silks were identified together with previously  
298 undescribed behaviors during ballooning: (i) an active sensing motion of the wind, (ii) an anchoring behavior  
299 during tiptoe takeoff, (iii) a tidying-up motion of an anchor line (drag line, safety line) and (iv) an outward  
300 stretching pose during a flight. These findings provide some clues and answers, which are previously unsolved in  
301 spiders' ballooning flight. The measured wind data also provide the possible mechanism from the viewpoint of the  
302 environment. We interpret as follows.

303

#### 304 **Spider's active sensing motion of the wind condition**

305 **Crab spiders showed the motion that seemed like actively evaluating the meteorological condition before**  
306 **their takeoff.** Normally ballooning behavior is first triggered either by a warm ambient temperature or by a rapid  
307 increase in ambient temperature [31,36]. Additionally, if they are exposed to a wind that is slower than  $3 \text{ m s}^{-1}$   
308 (favorable in  $0.35\text{--}1.7 \text{ m s}^{-1}$  wind speed for spiderlings), they show tiptoe behavior [1,3,36,37]. Until now, it had  
309 been thought that spiders sense the wind speed passively through the sensory hair (Trichobothria) on their legs  
310 [17,31,45]. However, the present observations show **that spiders may sense the aerodynamic condition of wind**  
311 **not just passively, but rather actively, raising their leg I high and shaking it.** Strong interactive behavior



312 transition between sensing motion and tiptoe motion (see Fig. 5A) supports that active sensing motions are related  
313 to the spiders' ballooning flight, because the tiptoe behavior is prerequisite behavior for ballooning takeoff (see  
314 Fig. 11). The leg-raising behavior can be interpreted as follows: the spider enhances the sensibility of its sensory  
315 hairs, by raising its legs upward in the outer region of the boundary layer, where airflows are faster than near the  
316 substrate and undisturbed by spiders' body themselves. The first instars of the *coccid Pulvinariella*  
317 *mesembryanthemi* show a similar behavior by standing on their hind legs to capitalize on higher air speed in the  
318 thin boundary layer for their aerial dispersal [46].

319 The spider's active sensing motion of the wind tells us two important things. **First, in spiders ballooning,**  
320 **aerodynamic force maybe be a dominant factor.** One hypothesis claims that an electrostatic charge on  
321 ballooning silks could generate lifting forces in the Earth's vertical atmospheric electrostatic field [22]. However,  
322 the leg-raising behavior indicates that, from the spider's viewpoint, airflow is an important factor for its ballooning.  
323 **Second, the spiders' ballooning may be not random flight that simply relies on the random condition of the**  
324 **wind, but they may sense and evaluate the condition of the wind and wait for the appropriate moment to**  
325 **initiate ballooning.** Thirty-eight percent of tiptoe behaviors lasted 10–65 sec. This can be interpreted that there  
326 may be favorable wind conditions for spiders to balloon. If spiders evaluate wind conditions and wait for their  
327 aerial dispersal, this can be a distinct feature of spiders' ballooning in contrast to other passive aerial dispersal, like  
328 that of seeds or aero-planktons. Additionally, this evaluating behavior can also save their silk dopes during their  
329 takeoff trials by reducing failure cases, for example, by avoiding unfavorable wind conditions after spinning the  
330 ballooning silks.

331 In the near surface atmospheric boundary layer, the updraft is not initiated by thermal buoyancy forces but is  
332 initiated by the shear winds, which generate shear-driven turbulent flows [47,48]. The generated turbulent eddies  
333 build intermittent updraft and downdraft regions, which drift to the downwind direction. If spiders sense either this  
334 moving updraft zone directly or the appropriate wind condition, which can build this moving updraft structure,  
335 indirectly, the spiders' sensing motion and timing the decision may be helpful for their successful takeoff.

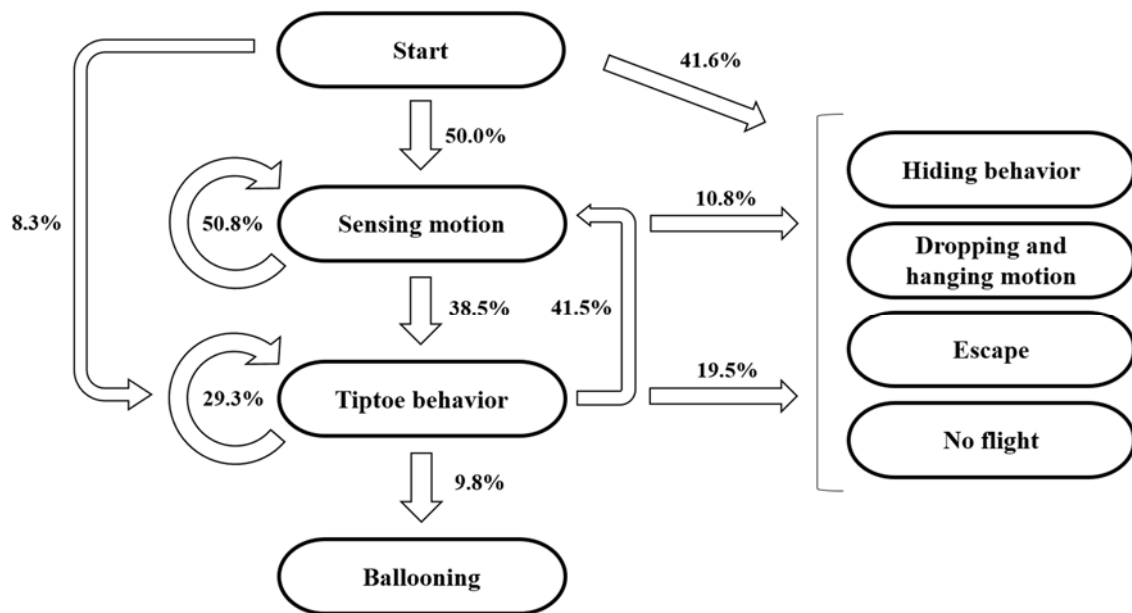

**Fig. 11. Takeoff process in tiptoe ballooning. The probabilities are calculated based on the total number of behaviors at each stage (see Fig. 5B).**

336

337 There are still other questions that can be asked. If spiders sense these wind conditions, what type of information  
 338 do spiders need for their decision to balloon? From previous studies and the author's observations, we deduce  
 339 several factors. (i) Wind speed: A spider does not show tiptoe behavior under conditions of high wind speed, over  
 340  $3 \text{ m s}^{-1}$  [1,3,36,37]. (ii) A vertical wind speed: Favorable condition for ballooning, usually vertical acceleration of  
 341 wind, persisting only for a few seconds. Under such a condition, the spider spins its silk fibers in wind rapidly and  
 342 releases its substrate [20,36]. (iii) Wind direction: From our observation, spiders rotate their body in the direction  
 343 of the wind, as soon as they have evaluated the wind condition. Therefore, at least, spiders perceive wind direction.  
 344 (iv) Wind fluctuation: For drop and swing dispersal, spiders were particularly more active with turbulent flows  
 345 [49]. This shows that spiders can perceive the fluctuation of a turbulent flow. Suter showed that the ballooning site  
 346 is usually laid within chaotic air flows [20]. Reynolds showed that the chaotic motion of turbulent flow reduces  
 347 the terminal speed of ballooners and that this feature enables long permanence in the air [16]. Therefore, it can be  
 348 deduced that spiders may sense the fluctuation of wind.

349

### 350 **Ballooning lines and anchored line**

351 For crab spiders, ballooning lines were not identical with a drag line. The source of ballooning lines are not well  
 352 known [3,19]. There is a report that some of primitive spiders, *Sphodros* spiderlings and *Ummidia* spiderlings,  
 353 which do not use the complex pre-ballooning behaviors such as tiptoe and rafting, use a drag line as a ballooning  
 354 line, which is known as "suspended ballooning" [10]. Spiders drop down from the end of a branch relying on their

355 drag line. If there is a breeze, the drag line near its point of attachment to the platform would be sheared and drift  
356 through the air [28,50]. From this context, many previous studies regarded that spiders use their drag line for  
357 ballooning dispersal [16,17,22,23,38]. Some experiments substituted a drag line for a ballooning line [18,19,21].  
358 However, Suter guessed from Tolbert's observation that ballooning lines might be different from the drag line  
359 [3,18,20]. Our observation assures that in crab spiders, these ballooning lines are not identical with a drag line,  
360 because those were spun from the either or both of the median or/and posterior spinnerets (see S8A, B). Normally,  
361 drag line is spun from major ampullate glands in anterior spinneret [51]. The crab spiders spun 48 to 58 thin nano-  
362 fibers and one pair of 2 thick nano-fibers. These thin nanoscale fibers seemed to be aciniform fibers (wrapping  
363 silk) from the median/poster spinnerets. The thick nanoscale fibers seemed to be minor ampullate silks from the  
364 median spinnerets. Because Moon and An observed that one of median spinnerets (left and right) of *Misumenops*  
365 *tricuspidatus* (crab spider) contains 2 pairs of ampullate glands and 20 ( $\pm 3$ ) pairs of aciniform glands and one of  
366 posterior spinnerets of it includes 50 ( $\pm 5$ ) pairs of aciniform glands [52]. Our observation in *Xysticus* species  
367 showed similar features with Moon and An's observation (see S8C, D).

368 The anchored drag lines are possibly normal drag lines (major ampullate silks), which a spider spins constantly  
369 while it is crawling and attaching its silk fibers to the ground surface for safety purposes. Because the anchored  
370 line was connected to the anterior spinnerets (see S8A) and was consisted of two fibres. From Osaki's observation,  
371 drag line are also composed with two fibers [53]. The anchored line can be observed in every ballooning behavior,  
372 not only rafting takeoff [10] but also tiptoe takeoff.

373 Before the spinning motion of ballooning lines, there was a motion of a rear leg (leg IV) (see S5), resembling  
374 "wrap spinning", which spiders use leg IV to initiate ballooning lines by wiping their spinnerets [53]. However, in  
375 our case, it was obvious that the spiders did use their leg IV not to initiate ballooning lines, but to tidy up the  
376 unfamiliarly positioned anchored line (safety line), which might have obstructed the spinning of ballooning silks  
377 (see S2A, B and S5A, B). During the tiptoe takeoff, this anchored line is normally cut in a short time mechanically,  
378 when a spider drifts fast either horizontally or at a small inclination. But when a spider becomes slowly airborne  
379 with a very steep inclination because of a local updraft, this line bears until it is lengthened to 3–5 m. In our opinion,  
380 it is not stretched, but a spider lengthened the safety silk by spinning an additional safety line. The reason is that  
381 the maximum elongation of spider silks is limited by about 30% [55,56]. This means that spiders control their  
382 anchored line during the steep or slow takeoff.

383

### 384 **Nanoscale multi-fibers and ballooning flight**

385 While the ballooning of small spiders, which are lighter than 2.0 mg, was investigated by calculation [17],

386 experiments [18,21] and observation [1,3], the plausibility of a large spider's ballooning was not yet explained  
 387 [17,39]. **The mysterious flying behavior of large spiders can be explained by their nanoscale multi-fibers.**  
 388 From our wind tunnel test, we found that the *Xysticus* genus uses tens of nano fibers (diameters of 121 to 323nm)  
 389 for their aerial dispersal (see Fig. 9A–D). The number of ballooning fibers and their lengths were identified. Based  
 390 on these measured values, the required updraft speed for the ballooning takeoff was calculated using modified  
 391 Humphrey's and Suter's equations (equation (4)–(8)) [17,18]. The fluid-dynamic interaction between each fibers  
 392 is not considered. The split case of fibers are calculated. **For a crab spider weighing 10 to 25 mg, the required**  
 393 **vertical wind velocities, according to Humphrey's theoretical formula 0.08–0.20 m s<sup>-1</sup>, and according to**  
 394 **Suter's empirical formula, are 0.04–0.09 m s<sup>-1</sup>.** These values are much smaller than the values, 9.2–21.6 m s<sup>-1</sup>,  
 395 which were calculated for *Stegodyphus* species [25,39]. We calculated the required length of ballooning fibers for  
 396 *Stegodyphus* species according to the updraft air speeds (see Fig. 12). **Our result shows that *Stegodyphus* species**  
 397 **can also balloon with relatively light updraft, 0.2–0.35 m s<sup>-1</sup>, with 3 m length and a total 80 numbering**  
 398 **ballooning fibers.** These results support Schneider's observation that adult females of the *Stegodyphus* genus, 80–  
 399 150mg, balloon with at least tens to hundreds of threads [26]. In this calculation, the number of ballooning fibers  
 400 for *Stegodyphus* genus are assumed conservatively that only one side (left or right) of the median and posterior  
 401 spinnerets are used for spinning ballooning fibers. This number of fibers is estimated by counting the fiber glands  
 402 of *Stegodyphus mimosarum*'s spinnerets (the number of minor ampullate fibers is 2, the number of aciniform fibers  
 403 is 78) [57]. This number is reasonable, because *Xysticus* species spun similar order of the number of fibers (2  
 404 number of thick fibers and 58 number of thin fibers from our experiments). The thicknesses of a minor ampullate  
 405 fiber and an aciniform fiber are assumed 80% and 25% of that of the major ampullate fiber, respectively. The  
 406 thickness of a major ampullate fiber is estimated from Suter's body weight and silk thickness relationship (equation  
 407 (8), Suter 1991).

408

$$D_H = \sum_{i=1}^n \frac{2\pi \cdot \mu \cdot U \cdot l_i}{\ln(2l_i/d_i) - 0.72} \times 10^6 \quad (4)$$

$$D_S = \sum_{i=1}^n 11.5 \cdot l_i \cdot V \cdot W_{eq,i}^{0.094} \quad (5)$$

$$U_H = \frac{W}{\sum_{i=1}^n \frac{2\pi \cdot \mu \cdot l_i}{\ln(2l_i/d_i) - 0.72} \times 10^6 + 1.94 \cdot W^{0.366}} \quad (6)$$

$$U_S = \frac{W}{\sum_{i=1}^n 11.5 \cdot l_i \cdot W_{eq,i}^{0.094} + 1.94 \cdot W^{0.366}} \quad (7)$$

$$W_{eq,i} = \frac{\pi(d_i \times 10^6)^2 + 0.184}{0.0277} \quad (8)$$

- 409  $D_H$ : Drag of multiple fibers by Humphrey's equation in  $\mu N$ .
- 410  $D_S$ : Drag of multiple fibers by Suter's equation in  $\mu N$ .
- 411  $U_H$ : Required vertical wind speed for ballooning using Humphrey's equation in  $m s^{-1}$ .
- 412 (The spider's body drag is used from the Suter's empirical relationship.)
- 413  $U_S$ : Required vertical wind speed for ballooning using Suter's equation in  $m s^{-1}$ .
- 414  $\mu$ : Dynamic viscosity of the air at 20°C ( $1.837 \times 10^{-5} kg \cdot m^{-1} \cdot s^{-1}$ ).
- 415  $U$ : Velocity of the air in  $m s^{-1}$ .
- 416  $l_i$ : Length of i-th silk fiber in m.
- 417  $d_i$ : Diameter of i-th silk fiber in m.
- 418  $W$ : Weight of the spider body in  $\mu N$ .
- 419  $W_{eq,i}$ : Equivalent weight of the spider body corresponding to the diameter of a ballooning fiber in  $\mu N$ .

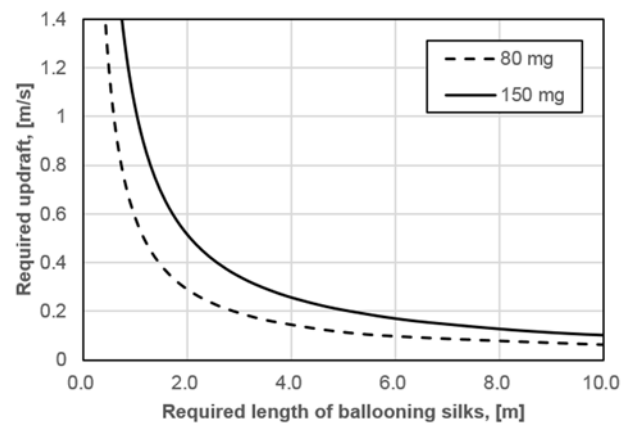

Fig. 12. Required updraft wind speed and length of ballooning silks for the ballooning of 80–150 mg *Stegodyphus* species. It is assumed that *Stegodyphus* species use 2 minor ampullate silks (2.1–2.9  $\mu m$  thickness) and 78 aciniform silks (650–900 nm thickness) for their ballooning.

420

421

## 422 Low Reynolds number fluid-dynamics in a spider's ballooning flight

423 The ballooning silks, exposed to the air, experience a low Reynolds number flow (Stokes flow, their Reynolds  
 424 number is lower than 1). The upper limit of the Reynolds number is about 0.04 ( $Re = \rho V d / \mu$ ; air density: 1.225  
 425  $kg m^{-3}$ , maximum possible velocity: 3  $m s^{-1}$ , thickness of spider silk: 211 nm, dynamic viscosity of air: 1.837 x 10<sup>-5</sup>  
 426  $kg m^{-1} s^{-1}$ ). The maximum possible speed that the thread experiences is assumed to be 3  $m s^{-1}$ , because a spider  
 427 seldom flies above this wind speed. Once a spider is airborne, the relative air speed with respect to the silk is

428 reduced. Therefore, the Reynolds number of spiders' silks during their flight is much smaller than 0.04, and the  
429 spider's flight is dominated by low Reynolds number fluid-dynamics [58]. However, a large spider's body shows  
430 much larger scales than those of a spider silk, not only in size, but also in weight. In a free-fall case of a spider  
431 body without any silks, the Reynolds number is about 2300 ( $Re = \rho V_t D / \mu$ ,  $V_t = \sqrt{2mg / (\rho AC_D)}$ ); a spider's body  
432 is assumed as a 5 mm diameter sphere with 25 mg weight, the projected area of a sphere:  $19.6 \text{ mm}^2$ , the coefficient  
433 of a sphere: 0.43, the terminal speed:  $6.2 \text{ m s}^{-1}$  [59]. In this Reynolds number flow regime, **the drag of a body is**  
434 **proportional to almost the square of relative wind speed**, because the Reynolds number region of  $5 < Re <$   
435  $3000$  is categorized as moderate Reynolds numbers, which inertial force of flow is still dominant in comparison  
436 with a viscous flow [60]. On the other hand, **the drag of spider silk is proportional to relative wind speed**,  
437 because a viscous force is dominant in this low Reynolds number regime ( $Re \ll 5$ ) [60]. **Therefore, the macro-**  
438 **scale spider's body, which means that a spider falls with acceleration without ballooning silks, is suspended**  
439 **by their high tensile strength nanoscale fibers that experience micro-scale fluid-dynamics (low Reynolds**  
440 **number flow). This enables a spider to float in the air like a particle which experiences relatively low**  
441 **Reynolds number flow.** The Reynolds number of a spider's body with ballooning fibres is about 30 ( $Re = \rho V D / \mu$ ;  
442 minimum possible velocity:  $0.09 \text{ m s}^{-1}$  by the lowest terminal speed from modified Suter's formula). The utilization  
443 of low Reynolds fluid-dynamics in ballooning flight is different from flight mechanics of other winged insects'  
444 flight, which mostly uses moderate or high Reynolds number aerodynamics,  $10^3 < Re < 10^5$  [61-63].

445

#### 446 **Low wind speed and turbulence**

447 **The measured vertical wind speeds of updrafts ranged 0–0.5 m s<sup>-1</sup> at the mean wind speed of 1.99 m s<sup>-1</sup> and**  
448 **0–0.7 m s<sup>-1</sup> at the mean wind speed of 3.07 m s<sup>-1</sup>. These values are enough for spiders' ballooning, the required**  
449 **vertical wind speeds of which were 0.04–0.2 m s<sup>-1</sup> for 10–25 mg *Xysticus* species and 0.2–0.35 m s<sup>-1</sup> for 80–**  
450 **150 mg *Stegodyphus* species.** The observed negative correlation between vertical wind speed and horizontal wind  
451 speed in the turbulent boundary layer, which has been also studied in the fields of fluid-dynamics and meteorology  
452 [42–44], suggests to us that **the reason spiders show their pre-ballooning behavior at a low wind speed regime**  
453 **(smaller than 3 m s<sup>-1</sup>) is because they may use the “ejection” regimes in turbulent flow, which contain updraft**  
454 **components and are induced by a “coherent structure” near the surface boundary layer.** A shear wind on a  
455 planted field, a meadow or relatively short plants, forms an organized structure called the “coherent structure”  
456 (possibly “hairpin vortex” or “horseshoe vortex,” see Fig. 13A, B; “hairpin vortex packets” over relatively short  
457 plants and “dual hairpin vortex structures” over planted field (see Fig. 13C, D)) [42,64–68]. These structures  
458 intermittently produce up- and downdrafts [42,65,67]. The interesting point is that these updrafts are highly

459 correlated with a decrease in wind speed, which is categorized as Q2 ( $u' < 0$  and  $v' > 0$ ), an “ejection” region in  
 460 a quadrant analysis [42–44] (see Fig. 10). Therefore, the phenomenon that spiders usually balloon in the low wind  
 461 speed regime (lower than  $3 \text{ m s}^{-1}$ ) could be explained with this organized structure in the atmospheric turbulent  
 462 flows above the ground. However, the frequency and duration of these updrafts are not well known.

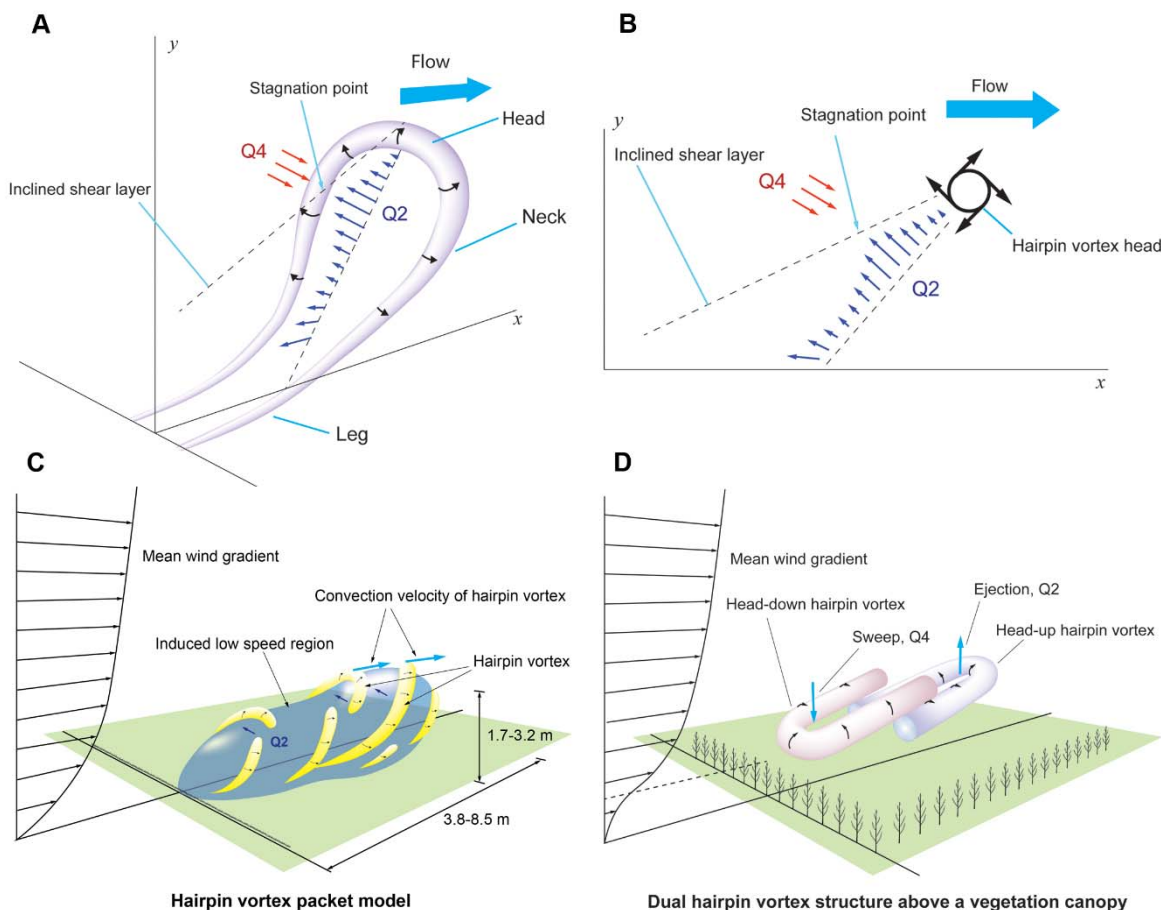

**Fig. 13.** (A) Schematic diagram of a single hairpin vortex in the wall boundary layer. Q2 is an “ejection” region whose velocity vectors are  $u' < 0$  and  $v' > 0$ . Q4 is a “sweep” region whose velocity vectors are  $u' > 0$  and  $v' < 0$ . (B) Cross-section of the x-y plane of the hairpin vortex. (C) Schematic diagram of the hairpin vortex packet. Yellow colors mean hairpins or cane-type vortices. Blue region means low momentum region, which contains upward air currents. (D) Coherent structure, “dual hairpin vortex,” on the plant field. Head-down hairpin vortex produces “sweep” event. Head-up hairpin vortex produces “ejection” event. (A, B) Redrawn from [65] (C) Redrawn from [65, 66] (D) Redrawn from [67]

463

464

### 465 Shear flow and the spider’s posture

466 While Reynolds postulated the tangled shape of ballooning fibers in his simulation, the diagonally lying shape of  
 467 the spider’s ballooning fibers was observed in our field observations in the Teltow canal (see Fig. 7) [16]. The  
 468 difference between our observation and Reynolds’ simulation is caused by the fact that while Reynolds introduced  
 469 homogeneous turbulence in his simulation, the real turbulence near the surface boundary layer includes  
 470 instantaneous horizontal wind shears that are mostly induced by vertical differences in wind speed [68,69]. This



471 diagonally stretched shape of ballooning fibers may be caused by the shear wind in the atmospheric boundary layer.  
472 We think that this may be helpful for long-endurance ballooning flight, because horizontally stretched silks produce  
473 more drag, up to a factor of 2, than vertically distributed shapes of silk, because of an anisotropic drag of silks in  
474 a low Reynolds number flow [70] (see S9).  
475 The observed facts, that spiders outstretch all legs outwards during their flight, is puzzling because of its small  
476 drag ratio compared to the drag of a spider's ballooning silks. Suter concluded that when a spider uses a relatively  
477 short length of silk, the influence of posture on its terminal speed is greater than when the silk is very long [19].  
478 However, our observation shows that spiders spin abundant ballooning fibres. From Suter's empirical formula,  
479 spiders' (weighing 10 to 25 mg) body drags per unit velocity, which are  $10.4\text{--}14.5 \mu\text{N} \cdot \text{m}^{-1} \cdot \text{s}$ , are just 0.4–0.56%  
480 of the whole drag (silks + body) per unit velocity,  $2576.5\text{--}2580.5 \mu\text{N} \cdot \text{m}^{-1} \cdot \text{s}$ . Even if a spider stretches their legs  
481 outwards, the percentage of body drag is still 2.0–2.8% (5-fold change is applied, from Suter's research) [18,19].  
482 Despite such a small drag effect of spiders' posture, spiders stretch their legs outwards during flight (see S6C, D).  
483 Then the question arises, what role do the stretched legs play in ballooning flight? These should be studied as a  
484 future work.

485

## 486 5. Conclusion and outlook

487 Studying ballooning mechanics in spiders can be helpful for understanding not only ecological influence of spiders'  
488 dispersal but also efficient passive transport of particles using air or oceanic currents.

489 By observing the ballooning behavior in relatively large spiders (10–25 mg *Xysticus* species) in the field and in  
490 the laboratory, we have revealed that the large spiders ballooning, even that of 80–150 mg *Stegodyphus* species, is  
491 possible with the help of tens of multiple nanoscale fibers. The observed ballooning lines were not identical to the  
492 drag line, which has been regarded as a ballooning line. From the observation of behaviors and morphological  
493 dimensions of fibers, we concluded that these ballooning silks are two of minor ampullate silks and multiple  
494 aciniform silks, which are usually used in other species as wrapping silks. *Xysticus* species, however, used these  
495 silks for their aerial dispersal. Spiders showed also interesting behaviors, active sensing motion, such as evaluating  
496 the wind conditions before their ballooning behavior. This behavior may save spider's silk dopes, which can be  
497 consumed during their takeoff trials.

498 Two major features in the physics of ballooning are suggested from the study. First, atmospheric shear flow may  
499 be helpful for the high buoyant capability of a ballooning structure, because horizontally/diagonally stretched silks  
500 produce more drag than vertically distributed shapes of silks. Second, spiders may use the updrafts that are induced  
501 by “coherent structures” in the turbulent atmospheric boundary layer. From the measured wind data, we showed

502 that these updrafts are correlated with lower wind speeds. Therefore, this hypothesis is expected that can explain  
503 the fact why spiders usually balloon when the wind speed is lower than  $3 \text{ m s}^{-1}$ . However, these suggestions should  
504 be studied further for theoretical firmness.

505 Whether or not vertical wind speed and fluctuation of wind influence on spiders' evaluation processes for  
506 ballooning, or why spiders stretch their legs outwards during their flight, are questions that still remain. These  
507 could be interesting topics for future research.

508

## 509 6. Supporting information

510 **S1 Fig. Ballooning behavior of a male crab spider. The spider shows the tiptoe behavior and spins ballooning silks.**

511 **S2 Fig. Sequential sketches of 'tiptoe' takeoff in the field experiment. Red lines: An anchored line (a drag line). Blue  
512 lines: Ballooning lines. (A) A spider, *Xysticus* species, tries to hold the anchored line with one of legs IV. (B) The spider  
513 holds the anchored line and then puts it on the substrate. (C) The spider first spins a single or a few number of fibers.  
514 (D) And then, the spider first spins many split fibers. (E) If the wind condition is appropriate, the spider releases the  
515 substrate. (F) In very short time, the anchored line is cut. The crab spider become airborne.**

516 **S3 Fig. Sequential sketches of rafting takeoff in the field experiment. Red lines: An anchored line (a drag line). Blue  
517 lines: Ballooning lines. (A)(B) A spider, *Xysticus* species, drops down about 0.4 to 1.1 m relying on its anchored line (a  
518 drag line) (C) The spider spins a single or a few number of fibers first downstream of the wind. (D) And then, the  
519 spider spins many fibers continuously. (E)(F) The spun ballooning lines slowly curved upwards. At some point, the  
520 anchored line near the spinnerets is cut and the spider balloons.**

521 **S4 Fig. The sketch describes the position of the hair dryer. The mixed air zone generates  $30^{\circ}$ – $35^{\circ}$ C warm air and  
522 fluctuating updraft (horizontal mean wind speed:  $0.58 \text{ m s}^{-1}$ , vertical mean wind speed:  $0.40 \text{ m s}^{-1}$ ).**

523 **S5 Fig. Tidying-up motion of safety line (anchored line) with leg IV. Two independent events; a front view (A), a side  
524 view (B). Both spiders hold their safety line and then put it on the substrate before spinning of ballooning lines.**

525 **S6 Fig. (A, B) An anchored line was found during a tiptoe takeoff. As soon as spiders were airborne, they stretched the  
526 legs outwards. (C) To ensure the behavior of outstretched legs during flight, the pose of a spider was observed during  
527 its gliding phase. (D) The spider kept its legs outstretched.**

528 **S7 Table. Numbers of behaviors on the artificial platform.**

529 **S8 Fig. (A) Spinning motion of ballooning silks in front of the open jet wind tunnel. Ballooning lines were spun from  
530 either or both of the median or/and posterior spinnerets. (B) Spinnerets of *Xysticus cristatus* through FESEM. (C)  
531 Median spinneret of *Xysticus* species. Two minor ampullate glands and 10 aciniform glands are distributed on the**

532 median spinneret. (D) A number of aciniform glands on the posterior spinneret.

533 **S9 Fig. (A) Ballooning structure in a shear flow. (B) Drift of a ballooning structure along with wind. The upper and**  
534 **lower parts of the silk are exposed to the flow fields, which exert to the other directions. (C) The ballooning structure**  
535 **exposed in a shear flow is stretched horizontally. If the drag of a body increases, the structure is stretched more**  
536 **horizontally. ( $V_{wG}$ : Wind speed profile relative to ground,  $V_D$ : Drift speed of a ballooning structure,  $V_{wR}$ : Wind speed**  
537 **profile relative to a ballooning structure,  $D_S$ : Horizontal component of drag on the spider's body,  $h$  : height)**

538 **S10 Movie. A pre-ballooning behavior of a crab spider, *Xysticus* species.**

539

## 540 7. Acknowledgements

541 We would like to thank Jason Dunlop of the Naturkundemuseum Berlin for advice on spider identification. Many  
542 thanks to Robert B. Suter for the detailed explanation of his research. We thank Iván Santibáñez Koref and  
543 Wladyslaw Chrusciel for the scientific discussions. We also thank Susi Koref, who improved the English in this  
544 manuscript. Especially, I would like to acknowledge the state of Berlin (Elsa-Neumann-Scholarship) for the  
545 support of PhD scholarship (2015–2018).

546

## 547 8. Competing interest

548 We have no competing interests to declare.

549

## 550 9. Author contributions

551 MS.C. designed the study, performed the experiments and wrote the text. I.R. and P.N. supervised the design of  
552 the study and contributed to the writing of the text. MS.C and C.F. executed the FESEM observation. All authors  
553 gave final approval for publication.

554

## 555 10. Funding

556 MS.C. was supported by the state of Berlin's Elsa-Neumann-Scholarship (T61004) during this study.

557

558

559

560

561

562 11. References

- 563 1. Richter CJJ. Aerial dispersal in relation to habitat in eight wolf spider species (Pardosa, Araneae,  
564 Lycosidae). *Oecologia* 1970;5(3):200–14.
- 565 2. Salmon JT, Horner NV. Aerial dispersion of spiders in North Central Texas. *The J. Arachnol.*  
566 1977;5(2):153–7.
- 567 3. Tolbert WW. Aerial dispersal behavior of two orb weaving spiders. *Psyche: A Journal of Entomology*  
568 1977;84(1):13–27.
- 569 4. Dean D.A, Sterling WL. Size and phenology of ballooning spiders at two locations in eastern Texas. *J.*  
570 *Arachnol.* 1985;(13):111–20.
- 571 5. Greenstone MH, Morgan CE, Hultsch AL, Farrow RA, Dowse JE. Ballooning spiders in Missouri,  
572 USA, and New South Wales, Australia: Family and mass distributions. *J. Arachnol.* 1987;15(2):163–  
573 70.
- 574 6. Morse DH. Dispersal of the spiderlings of *Xysticus Emertonu* (Araneae, Thomisidae), a litter-dwelling  
575 crab spider. *J. Arachnol.* 1992;(20):217–221.
- 576 7. Cbosby CR, Crosby, C. R. and Bishop, S. C. Aeronautic spiders with a description of a new species.  
577 *Journal of the New York Entomological Society* 1936;1(44):43–9. Available from:  
578 <http://www.jstor.org/stable/25004641>.
- 579 8. McCook HC. American spiders and their spinning work: A natural history of the orbweaving spiders of  
580 the United States : with special regard to their industry and habits. *Landisville, PA: Coachwhip*  
581 *Publications*;2006.
- 582 9. Blackwall J. Observations and experiments, made with a view to ascertain the means by which the  
583 spiders that produce gossamer effect their aerial excursions. *Transactions of the Linnean Society of*  
584 *London* 1827;(15):449–59.
- 585 10. Bell JR, Bohan DA, Shaw EM, Weyman GS. Ballooning dispersal using silk: World fauna, phylogenies,  
586 genetics and models. *BER* 2005;95(02):2.
- 587 11. Darwin C. Journal of researches into the natural history and geology of the countries visited during the  
588 voyage of H.M.S. Beagle round the world, under the Command of Capt. Fitz Roy, R.N. 2nd ed. New  
589 York: John Murray, Albemarle Street;1845.
- 590 12. Glick PA. The distribution of insects, spiders, and mites in the air. *USDA Tech Bull* 1939;(673):1–150.

- 591 13. Bilsing SW. Quantitative studies in the food of spiders. *The Ohio Journal of Science* 1920;20(7):215–  
592 60.
- 593 14. Bristowe WS. A Preliminary Note on the Spiders of Krakatau. Proceedings of the Zoological Society of  
594 London 1931;101(4):1387–400.
- 595 15. Hormiga G. Orsonwells, A new genus of giant linyphild spiders (Araneae) from the Hawaiian Islands.  
596 *Invert. Systematics* 2002;16(3):369–448.
- 597 16. Reynolds AM, Bohan DA, Bell JR. Ballooning dispersal in arthropod taxa with convergent behaviours:  
598 dynamic properties of ballooning silk in turbulent flows. *Biol Lett* 2006;2(3):371–3.
- 599 17. Humphrey JAC. Fluid mechanic constraints on spider ballooning. *Oecologia* 1987;73(3):469–77.
- 600 18. Suter RB. Ballooning in spiders: Results of wind tunnel experiments. *Ethology Ecology & Evolution*  
601 1991;3(1):13–25.
- 602 19. Suter RB. Ballooning: Data from spiders in freefall indicate the importance of posture. *J. Arachnol.*  
603 1992;2(20):107–13. Available from: <http://www.jstor.org/stable/3705774>.
- 604 20. Suter RB. An aerial lottery: The physics of ballooning in a chaotic atmosphere *J. Arachnol.*  
605 1999;1(27):281–93. Available from: <http://www.jstor.org/stable/3705999>.
- 606 21. Bell JR, Bohan DA, Le Fevre R, Weyman GS. Can simple experimental electronics simulate the  
607 dispersal phase of spider ballooners? *J. Arachnol.* 2005; 33(2):523–32.
- 608 22. Gorham PW. Ballooning Spiders: The Case for Electrostatic Flight 2013. Available from:  
609 <https://arxiv.org/abs/1309.4731v2>.
- 610 23. Sheldon KS, Zhao L, Chuang A, Panayotova IN, Miller LA, Bourouiba L. Revisiting the physics of  
611 spider ballooning. *Women in Mathematical Biology* 2017;8:125–39.
- 612 24. Weyman GS. A review of the possible causative factors and significance of ballooning in spiders.  
613 *Ethology Ecology & Evolution* 1993; 5(3):279–91.
- 614 25. Wickler W, Seibt U. Aerial dispersal by ballooning in adult *Stegodyphus mimosarum*.  
615 *Naturwissenschaften* 1986;73(10):628–9.
- 616 26. Schneider JM, Roos J, Lubin Y, Henschel JR. Dispersal of *Stegodyphus Dumicola* (Araneae, Eresidae):  
617 They Do balloon after all! *J. Arachnol.* 2001;(29):114–6.
- 618 27. Simonneau M, Courtial C, Pétilion J. Phenological and meteorological determinants of spider  
619 ballooning in an agricultural landscape. *C R Biol* 2016; 339(9-10):408–16.

- 620 28. Coyle FA, Greenstone MH, Hultsch AL, Morgan CE. Ballooning mygalomorphs: estimates of the  
621 masses of Sphodros and ummidia ballooners (Araneae: Atypidae, Ctenizidae). *J. Arachnol.* 1985;  
622 13(3):291–6.
- 623 29. Greenstone MH, Morgan CE, Hultsch AL. Spider ballooning: development and evaluation of field  
624 trapping methods. *J. Arachnol.* 1985;13(3):337–45.
- 625 30. Greenstone MH. Meteorological determinants of spider ballooning: the roles of thermals vs. the vertical  
626 windspeed gradient in becoming airborne. *Oecologia* 1990;84(2):164–8.
- 627 31. Vugts HF, Van Wingerden WKRE. Meteorological aspects of aeronautic behaviour of spiders. *Oikos*  
628 1976;27(3):433.
- 629 32. Bristowe WS. The comity of spiders. Lymington: Pisces Conservation/Ray Society;2004.
- 630 33. Duffey E. Aerial dispersal in a known spider population. *The Journal of Animal Ecology* 1956;1(25):85.
- 631 34. Bishop L. Meteorological aspects of spider ballooning. *Environmental Entomology* 1990;19(5):1381–7.
- 632 35. Van Wingerden WKRE, Vugts, HF. Factors influencing aeronautic behaviour of spiders. *Bulletin of the*  
633 *British Arachnological Society* 1974;3(1):6-10
- 634 36. Richter C. Some aspects of aerial dispersal in different populations of wolf spiders, with particular  
635 reference to *Pardosa Amentata* (Araneae Lycosidae). Miscellaneous Papers, Landbouwhogeschool,  
636 Wageningen 1971;(8):77–88.
- 637 37. Lee VMJ, Kuntner M, Li D. Ballooning behavior in the golden orb web spider *Nephila pilipes*  
638 (Araneae: Nephilidae). *Front. Ecol. Evol.* 2015;3:e86780.
- 639 38. Zhao L, Panayotova IN, Chuang A, Sheldon KS, Bourouiba L, Miller LA. Flying spiders: Simulating  
640 and modeling the dynamics of ballooning. *Women in Mathematical Biology* 2017;8:179–210.
- 641 39. Henschel JR. Dispersal mechanisms of *Stegodyphus* (Eresidae): Do they balloon? *J. Arachnol.*  
642 1995;(23):202–4.
- 643 40. Willmarth WW, Lu SS. Structure of the Reynolds stress near the wall. *J. Fluid Mech.* 1972;55(01):65.
- 644 41. Lu SS, Willmarth WW. Measurements of the structure of the Reynolds stress in a turbulent boundary  
645 layer. *J. Fluid Mech.* 1973;60(03):481.
- 646 42. Adrian RJ. Hairpin vortex organization in wall turbulence. *Physics of Fluids* 2007;19(4):041301.
- 647 43. Zhu W, van Hout R, Katz J. PIV Measurements in the atmospheric boundary layer within and above a  
648 mature corn canopy. Part II: Quadrant-hole analysis. *J. Atmos. Sci.* 2007;64(8):2825–38.

- 649 44. Steiner AL, Pressley SN, Botros A, Jones E, Chung SH, Edburg SL. Analysis of coherent structures and  
650 atmosphere-canopy coupling strength during the CABINEX field campaign. *Atmos. Chem. Phys.*  
651 2011;11(23):11921–36.
- 652 45. Palmgren P. Experimentelle Untersuchungen über die Funktion der Trichobothrien bei Tegenaria  
653 Derhami. *Soc. Acta Zool. Fenn.* 1936;(19):3–28.
- 654 46. Washburn JO, Washburn L. Active aerial dispersal of minute wingless arthropods: exploitation of  
655 boundary-layer velocity gradients. *Science* 1984;223(4640):1088–9.
- 656 47. Hunt JC, Morrison JF. Eddy structure in turbulent boundary layers. *European Journal of Mechanics -*  
657 *B/Fluids* 2000;19(5):673–94.
- 658 48. McNaughton KG. Turbulence structure of the unstable atmospheric surface layer and transition to the  
659 outer layer. *Boundary-Layer Meteorology* 2004;112(2):199–221.
- 660 49. Barth F, Komarek S, Humphrey J, Treidler B. Drop and swing dispersal behavior of a tropical  
661 wandering spider: Experiments and numerical model. *J Comp Physiol A* 1991;169(3).
- 662 50. Coyle FA. Aerial dispersal by mygalomorph spiderlings (Araneae, Mygalomorphae). *J. Arachnol.*  
663 1983;(11):283–6.
- 664 51. Vollrath F. Strength and structure of spiders' silks. *Journal of Biotechnology* 2000; 74(2):67–83.
- 665 52. Moon MJ, An JS. Spinneret Microstructure of the Silk Spinning Apparatus in the Crab Spider,  
666 *Misumenops tricuspidatus* (Araneae: Thomisidae). *Entomol Research* 2005;35(1):67–74.
- 667 53. Osaki S. Is the mechanical strength of spider's drag-lines reasonable as lifeline? *International Journal*  
668 *of Biological Macromolecules* 1999;24(2–3):283–7.
- 669 54. Eberhard WG. How spiders initiate airborne lines. *J. Arachnol.* 1987;1(15):1–9.
- 670 55. Ko FK, Kawabata S, Inoue M, Niwa M, Fossey S, Song JW. Engineering properties of spider silk. *MRS*  
671 *Proc.* 2001;702:91.
- 672 56. Bonino MJ. Material Properties of Spider Silk. dissertation. *Rochester, NY: The College School of*  
673 *Engineering and Applied Sciences*;2003.
- 674 57. Griswold CE. Atlas of phylogenetic data for entelegyne spiders (Araneae : Araneomorphae :  
675 Entelegynae): With comments on their phylogeny. In: *Proceedings of the California Academy of*  
676 *Sciences*, 4th series (Vol. 56, Suppl. 2) San Francisco: California Academy of Sciences;2005.



- 677 58. Purcell EM. Life at low Reynolds number. *Am. J. Phys.* 1977;45:3–11.
- 678 59. Roos FW, Willmarth WW. Some experimental results on sphere and disk drag. *AIAA Journal*  
679 1971;9(2):285–91.
- 680 60. Pelegrini MF, Vieira EDR. Flow past a sphere moderate Reynolds numbers. 17th International  
681 Congress of Mechanical Engineering, November 10-14, 2003, São Paulo, SP.
- 682 61. Dudley R. The biomechanics of insect flight: Form, function, evolution. Princeton, NJ: Princeton Univ.  
683 Press;2002.
- 684 62. Sane SP. The aerodynamics of insect flight. *Journal of Experimental Biology* 2003;206(23):4191–208.
- 685 63. Bomphrey RJ, Nakata T, Phillips N, Walker SM. Smart wing rotation and trailing-edge vortices enable  
686 high frequency mosquito flight. *Nature* 2017;544(7648):92–5.
- 687 64. Theodorsen T. Mechanism of turbulence. In Proc. Midwestern Conf. *Fluid Dyn.*, Ohio State University,  
688 Columbus, Ohio. 1952.
- 689 65. Adrian RJ, Meinhart CD, Tomkins CD. Vortex organization in the outer region of the turbulent  
690 boundary layer. *J. Fluid Mech.* 2000;422:1–54.
- 691 66. Hommema SE, Adrian RJ. Packet structure of surface eddies in the atmospheric boundary layer.  
692 *Boundary-Layer Meteorology* 2003;106(1):147–70.
- 693 67. Finnigan JJ, Shaw RH, Patton EG. Turbulence structure above a vegetation canopy. *J. Fluid Mech.*  
694 2009;637:387.
- 695 68. Dennis DJC. Coherent structures in wall-bounded turbulence. *An Acad Bras Cienc* 2015;87(2):1161–  
696 93.
- 697 69. Grass AJ. Structural features of turbulent flow over smooth and rough boundaries. *J. Fluid Mech.*  
698 1971;50:233.
- 699 70. Childress S. Mechanics of swimming and flying. In: Cambridge studies in mathematical biology, vol.  
700 2.: Cambridge University Press;1981. Available from: <https://doi.org/10.1017/CBO9780511569593>.
